# Supplementary material
Source: PubMed Central journal article supplement (PMC3172822)

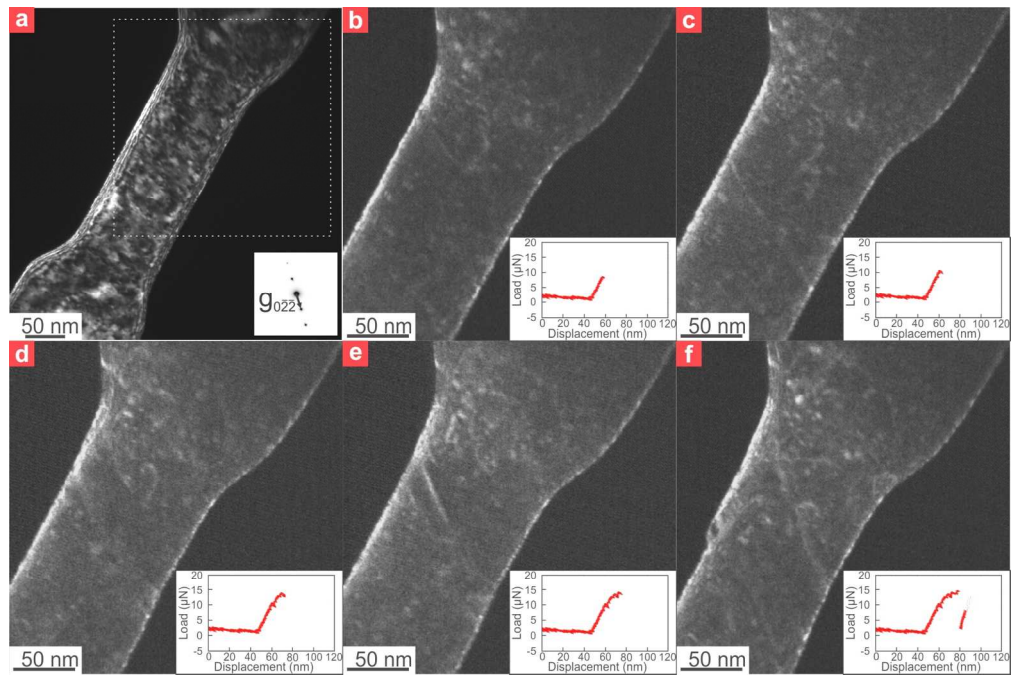

160x106mm (300 x 300 DPI)

Supplement: nl201890s_si_001.pdf [file nl201890s_si_001.pdf]

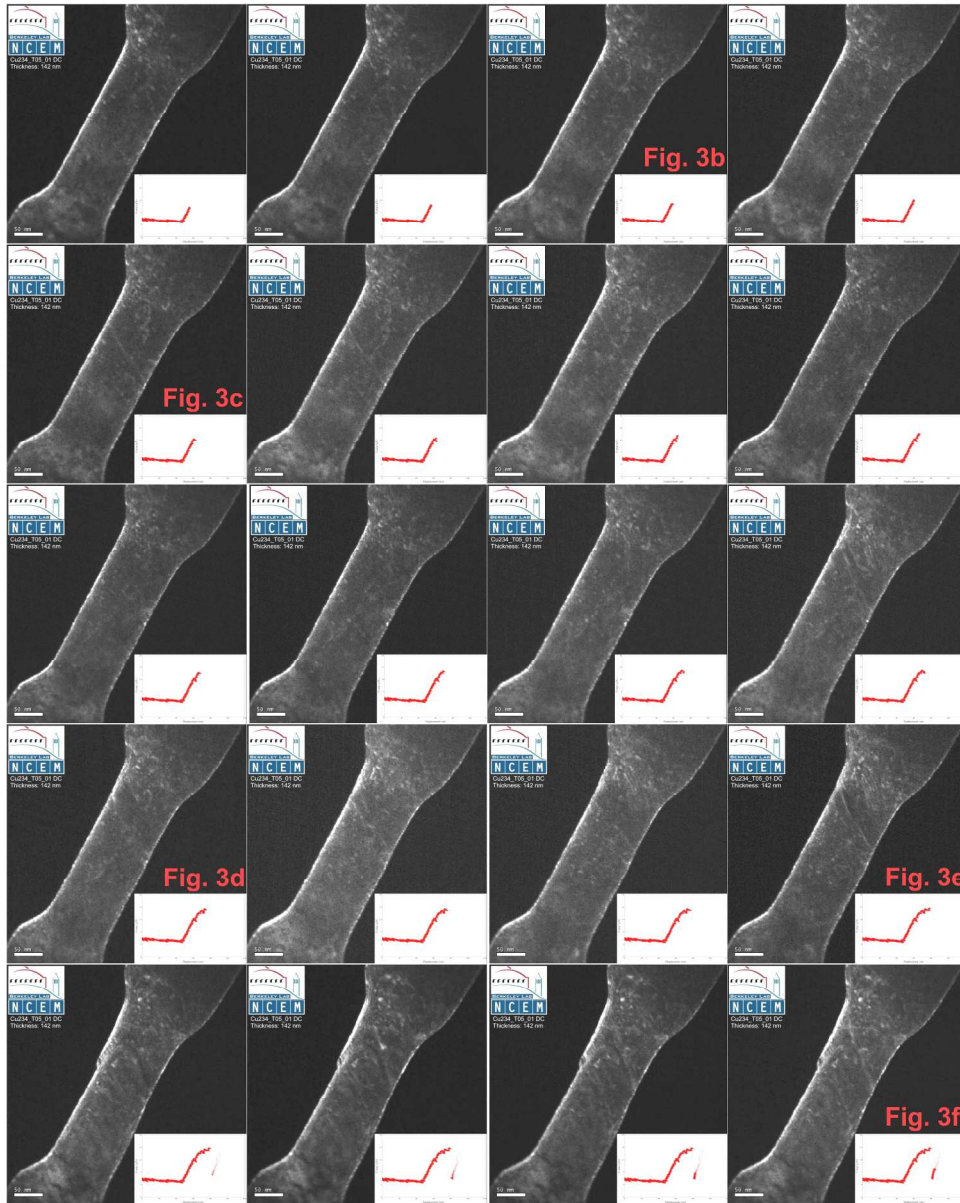

320x400mm (300 x 300 DPI)

Supplement: nl201890s_si_002.pdf [file nl201890s_si_002.pdf]
